# Supplementary material for: Evidence-based guidelines for controlling pH in mammalian live-cell culture systems
Source: PubMed Central journal article supplement (PMC6486606; doi:10.1038/s42003-019-0393-7), 2019-04-26
Supplement: 42003_2019_393_MOESM1_ESM.pdf [file 42003_2019_393_MOESM1_ESM.pdf]

## SUPPLEMENTARY NOTE

### Deriving buffering capacity

In any biological system, a large pool of  $H^+$  ions is held on buffers. This is represented chemically by the equilibrium involving the buffer's ionised (B) and protonated (HB) states:

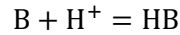

The acid-dissociation constant of this equilibrium is defined as:

$$K_a = \frac{[H^+] \cdot [B]}{[HB]} \quad (\text{Eq 4})$$

The system's buffering capacity can be expressed as the ratio between the change in [B] (or [HB]) and the measured  $[H^+]$  response. In a closed system, the sum of [B] and [HB] is constant ( $C_B$ ). By applying this to Eq 4, it is possible to derive an expression for [B]:

$$[H^+] = K_a \cdot \frac{C_B - [B]}{[B]}$$

$$[B] = \frac{K_a \cdot C_B}{K_a + [H^+]}$$

Buffering capacity, quantified as  $\Delta[B]/\Delta[H^+]$ , becomes a derivative for infinitesimal  $[H^+]$  changes:

$$\frac{d[B]}{d[H^+]} = -\frac{K_a \cdot C_B}{(K_a + [H^+])^2}$$

Since pH is the reporting standard for changes in  $[H^+]$ , a more appropriate quantification for buffering is  $d[B]/dpH$ , which can be expanded by a mathematical formula called the chain rule:

$$\begin{aligned} \frac{d[B]}{dpH} &= \frac{d[B]}{d[H^+]} \cdot \frac{d[H^+]}{dpH} = \left( -\frac{K_a \cdot C_B}{(K_a + [H^+])^2} \right) \cdot (-\ln(10) \cdot [H^+]) \\ &= \ln(10) \cdot C_B \cdot \frac{K_a \cdot [H^+]}{(K_a + [H^+])^2} = \ln(10) \cdot C_B \cdot \frac{10^{pK_a - pH}}{(1 + 10^{pK_a - pH})^2} \end{aligned} \quad (\text{Eq 5})$$

Note that  $dpH/d[H^+]$  is the first derivative of  $-\log_{10}([H^+])$ . Eq 5 shows that peak buffering capacity is attained when medium pH aligns with the buffer's  $pK_a$ . Under these circumstances, the buffer's protonated and unprotonated forms are equal in concentration (Eq 1).

In contrast to closed buffer systems,  $CO_2/HCO_3^-$  is considered an open system because its components can be biologically regulated. For media inside a  $CO_2$  incubator, the concentration of the acidic form of the buffer (rather than the sum of the acidic and basic forms) is constant. Adapting this to Eq 4,

$$K_a = \frac{[H^+] \cdot [HCO_3^-]}{[CO_2]}$$

$$[HCO_3^-] = \frac{K_a \cdot [CO_2]}{[H^+]}$$

$$\frac{d[HCO_3^-]}{d[H^+]} = -\frac{K_a \cdot [CO_2]}{([H^+])^2}$$

$$\frac{d[HCO_3^-]}{dpH} = \ln(10) \cdot \frac{K_a \cdot [CO_2]}{[H^+]} = \ln(10) \cdot [HCO_3^-]$$

### Henderson-Hasselbalch correction

According to the Henderson-Hasselbalch equation, the concentration of  $\text{HCO}_3^-$  required to attain a given target pH ( $\text{pH}_{\text{target}}$ ) at 5%  $\text{CO}_2$  (1.2 mM) is:

$$[\text{HCO}_3^-] = 1.2 \times 10^{\text{pH}_{\text{target}} - 6.15}$$

When a medium containing a salt of  $\text{HCO}_3^-$  and intrinsic buffers (e.g. serum proteins) is placed in a 5%  $\text{CO}_2$  incubator, the  $\text{CO}_2$  hydration reaction proceeds until equilibrium is reached:

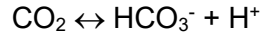

Intrinsic buffers will chelate some of the  $\text{H}^+$  ions, allowing the reaction to proceed towards a combination of higher  $[\text{HCO}_3^-]$  and lower  $[\text{H}^+]$ . Consequently, the standard Henderson-Hasselbalch equation will underestimate the pH of solutions prepared with low  $[\text{HCO}_3^-]$ . The necessary correction can be derived mathematically by solving a system of differential equations:

$$\frac{d\text{pH}}{dt} = - \frac{k_h \cdot [\text{CO}_2] - k_r \cdot [\text{HCO}_3^-] \cdot [\text{H}^+]}{\beta_{\text{intrinsic}}}$$

$$\frac{d[\text{HCO}_3^-]}{dt} = k_h \cdot [\text{CO}_2] - k_r \cdot [\text{HCO}_3^-] \cdot [\text{H}^+]$$

Here,  $k_h$  is the  $\text{CO}_2$  hydration constant ( $0.19 \text{ s}^{-1}$ ),  $k_r$  is the rate constant of the reverse reaction (equal to  $K_a/k_h$ ) and  $[\text{CO}_2]$  takes a constant value of 1.2 mM in a 5%  $\text{CO}_2$  incubator. Intrinsic buffering capacity is given by a constant  $\beta_{\text{intrinsic}}$ . The equation can be solved for a given starting  $[\text{HCO}_3^-]$  to obtain a steady-state relationship (i.e.  $d\text{pH}/dt = d[\text{HCO}_3^-]/dt = 0$ ) between added  $[\text{HCO}_3^-]$  and pH at 5%  $\text{CO}_2$ . Assuming serum has a pH of 7.4, it can be shown that the correction to starting  $[\text{HCO}_3^-]$  is:

$$\Delta[\text{HCO}_3^-] = \beta_{\text{intrinsic}} \times (\text{pH}_{\text{target}} - 7.4)$$

Thus,  $[\text{HCO}_3^-]$  required to produce a medium at  $\text{pH}_{\text{target}}$  in 5%  $\text{CO}_2$  is given by:

$$[\text{HCO}_3^-] = 1.2 \times 10^{\text{pH}_{\text{target}} - 6.15} + \beta_{\text{intrinsic}} \times (\text{pH}_{\text{target}} - 7.4) \quad (\text{Eq 6})$$

Sera used in this study produced a  $\beta_{\text{intrinsic}}$  of  $1.11 \text{ mM pH}^{-1}$  (**Fig 1C**), determined by best-fit, but will likely vary depending on the type and concentration of serum used.
